# Supplementary material for: Filter Papers to Collect Blood Samples from Dogs: An Easier Way to Monitor the Mass Vaccination Campaigns against Rabies?
Source: MDPI journal article supplement (doi:10.3390/v14040711), 2022-03-29
Supplement: s1 [file s1]

**Table S1 : sera titrated using the BioPro ELISA kit versus sera titrated using the FAVN test**

|                      |                            | BioProRabies ELISA Ab kit – sera       |                    |                          |                                  |                    |                          |
|----------------------|----------------------------|----------------------------------------|--------------------|--------------------------|----------------------------------|--------------------|--------------------------|
| Assay                | Result                     | Dogs- Experimental conditions (France) |                    |                          | Dogs- Field conditions (Tunisia) |                    |                          |
|                      |                            | Positive<br>(≥70%)                     | Negative<br>(<70%) | <i>Overall agreement</i> | Positive<br>(≥70%)               | Negative<br>(<70%) | <i>Overall agreement</i> |
| FAVN<br>test<br>sera | Positive<br>(≥0.5 IU/mL)   | 63                                     | 1                  |                          | 39                               | 8                  |                          |
|                      | – Negative<br>(<0.5 IU/mL) | 16                                     | 53                 | 87.2%                    | 7                                | 29                 | 81.9%                    |
|                      | Total                      | 79                                     | 54                 |                          | 46                               | 37                 |                          |
